# Supplementary material for: Vancomycin-loaded hydrogels with thermal-responsive, self-peeling, and sustainable antibacterial properties for wound dressing
Source: Royal Society of Chemistry journal article supplement (doi:10.1039/d3tb02084c), 2023-12-11
Supplement: d3tb02084c1.pdf [file d3tb02084c1.pdf]

## Supporting information

### Vancomycin-loaded hydrogels with thermal responsive self-peeling and sustainable antibacterial properties for wound dressing

Yun Tang<sup>a</sup>, Xinrui Shu<sup>a</sup>, Guandi He<sup>c</sup>, Yuhan Zhang<sup>b</sup>, Yonghe Zhao<sup>b</sup>, Hudie Yuan<sup>a</sup>, Jingjie Yu<sup>b</sup>,

Jiabao Guo<sup>b</sup>, Qiang Chen<sup>b,\*</sup>

<sup>a</sup> School of Materials Science & Engineering, Xi'an University of Architecture & Technology,

Xi'an, Shaanxi 710055, China

<sup>b</sup> State Key Laboratory of solidification processing, School of Materials Science and Engineering,

Northwestern Polytechnical University, Xi'an, Shaanxi 710072, China

<sup>c</sup> School of Queen Mary University of London Engineering, Northwestern Polytechnical

University, Xi'an 710072, China

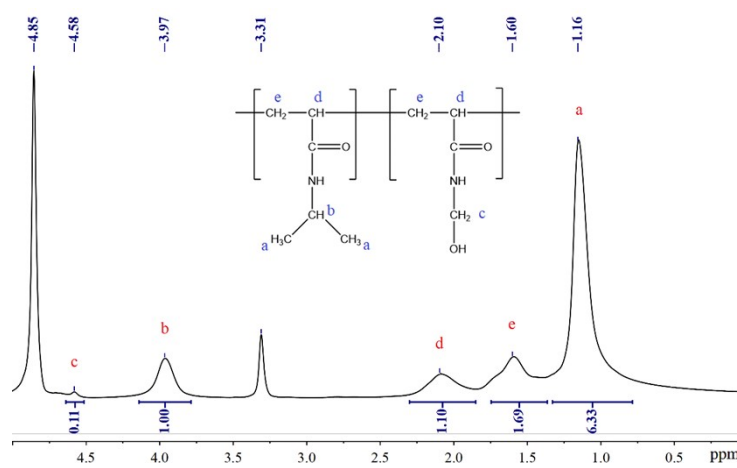

Fig. S1 NMR spectrum of Poly (NIPAAm-co-NMA) copolymer.

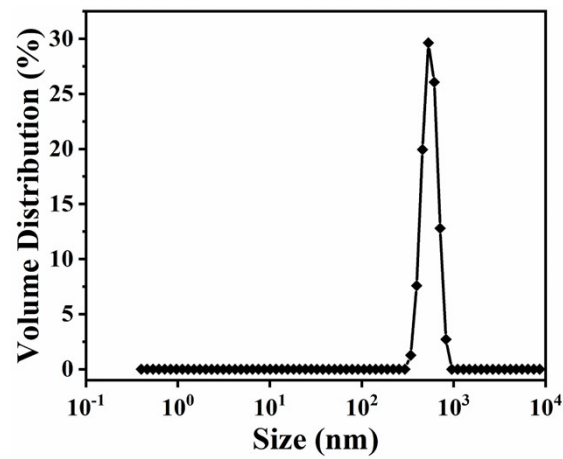

Fig. S2 Diameter distribution of GNs in swollen state.

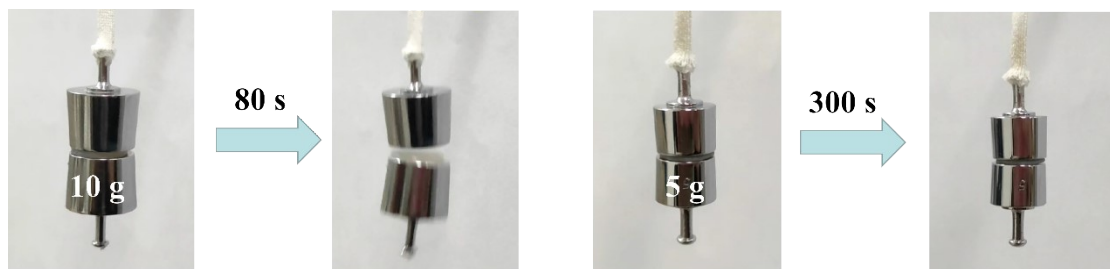

Fig. S3 Qualitative assessment of adhesivity of Gel-3.

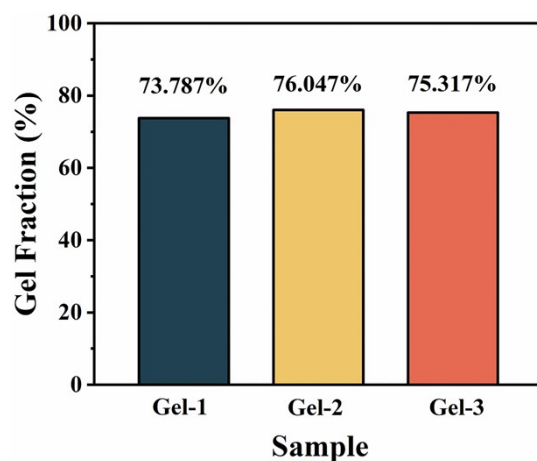

Fig. S4 Gel fraction of Gel-1, Gel-2 and Gel-3.

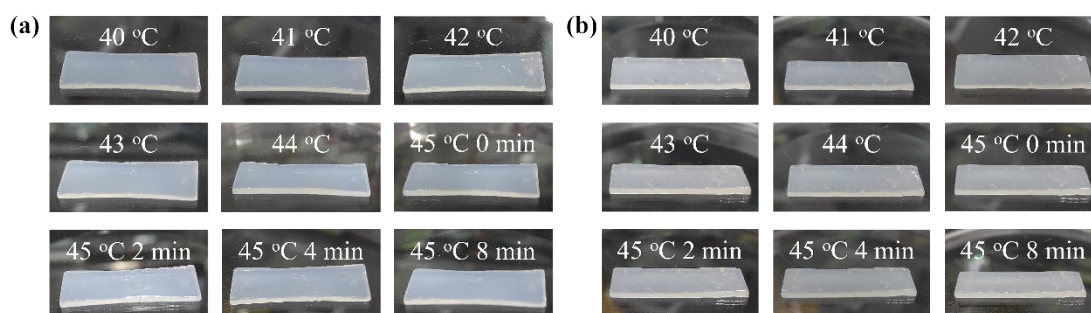

Fig. S5 Optical images of Gel-1 (a) and Gel-2 (b) in water bath under different temperature.

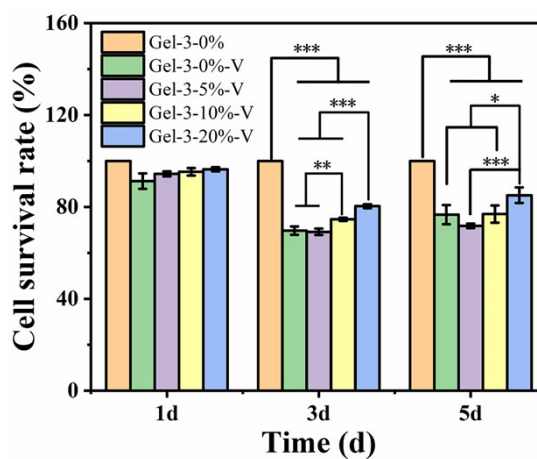

Fig. S6 Cell survival rate of drug-loaded hydrogels with different GNs content.
